# Supplementary material for: Placental sex-dependent spermine synthesis regulates trophoblast gene expression through acetyl-coA metabolism and histone acetylation
Source: PubMed Central journal article supplement (PMC9200719; doi:10.1038/s42003-022-03530-6), 2022-06-15
Supplement: 42003_2022_3530_MOESM3_ESM.pdf [file 42003_2022_3530_MOESM3_ESM.pdf]

## **Description of Additional Supplementary Files**

**File name:** Supplementary Data 1

**Description:** Differentially expressed genes (DEGs) in male vehicle vs DFMO

**File Name:** Supplementary Data 2

**Description:** Differentially expressed genes (DEGs) in female vehicle vs DFMO

**File Name:** Supplementary Data 3

**Description:** Differentially binding regions (DBRs) in male vehicle vs DFMO

**File Name:** Supplementary Data 4

**Description:** Differentially binding regions (DBRs) in male vehicle vs DFMO

**File Name:** Supplementary Data 5

**Description:** List of primers

**File Name:** Supplementary Data 6

**Description:** Key Resources Table

**File name:** Supplementary Data 7

**Description:** Source Data

**File name:** Supplementary Data 8

**Description:** Uncropped western blots
