# Supplementary material for: Placental sex-dependent spermine synthesis regulates trophoblast gene expression through acetyl-coA metabolism and histone acetylation
Source: PubMed Central journal article supplement (PMC9200719; doi:10.1038/s42003-022-03530-6), 2022-06-15
Supplement: 42003_2022_3530_MOESM11_ESM.pdf [file 42003_2022_3530_MOESM11_ESM.pdf]

V D V D V D V D V D V D V D

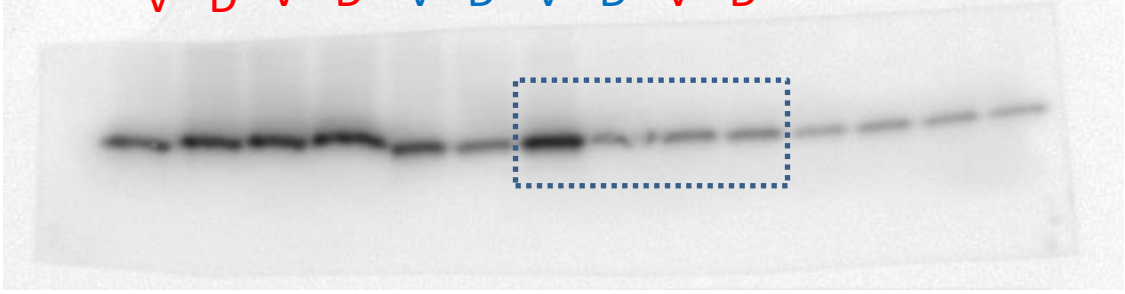

H3K9Ac

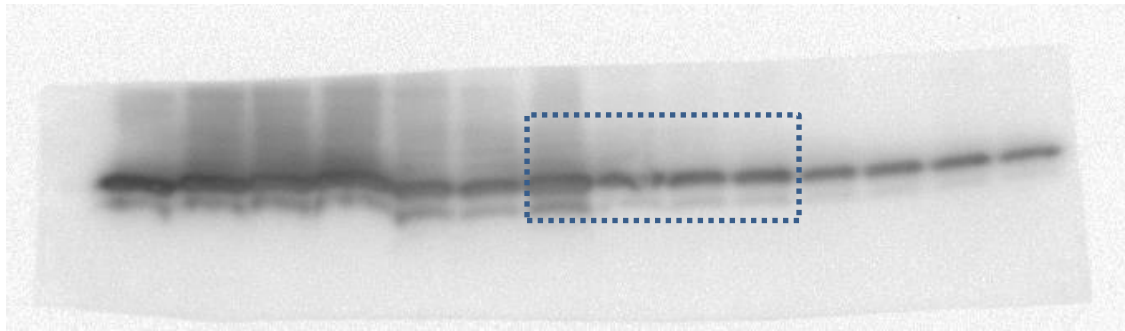

Stripped & reprobed H3

V D V D V D V D V D V D V D

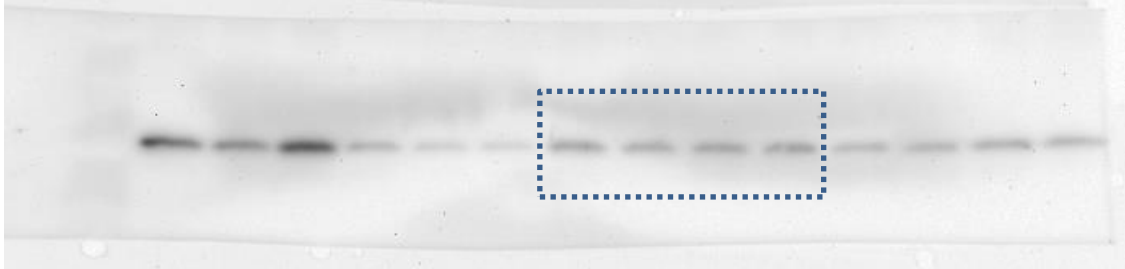

H3K14Ac

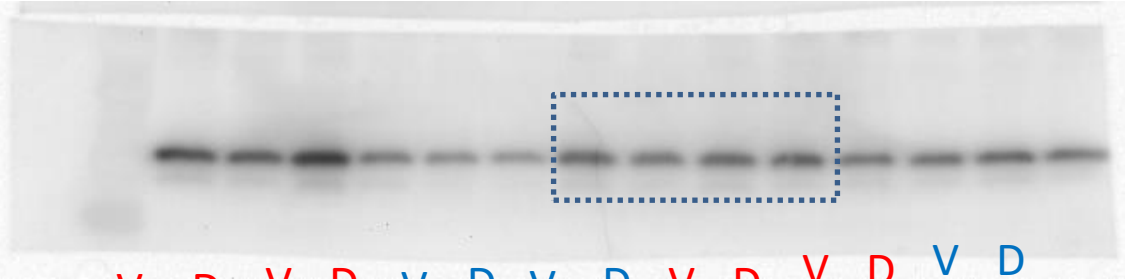

Stripped & reprobed H3

V D V D V D V D V D V D V D

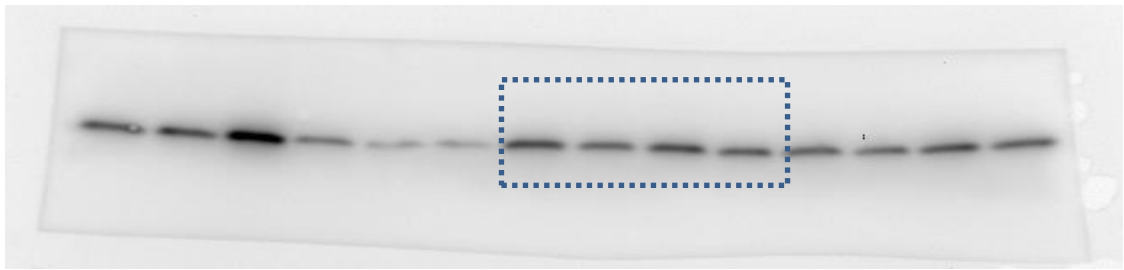

H3K18Ac

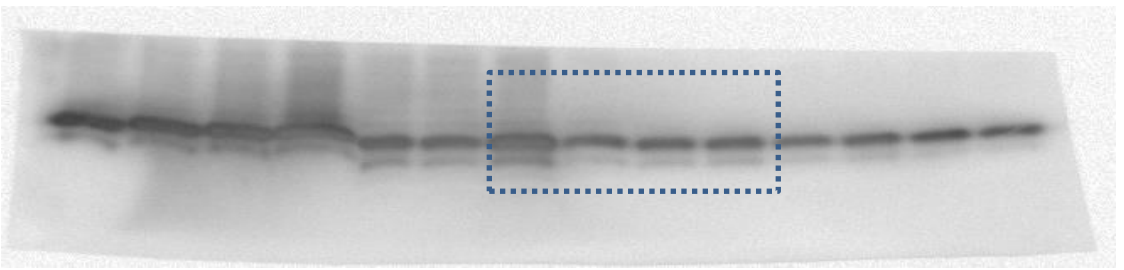

Stripped & reprobed H3

V D V D V D V D V D V D V D

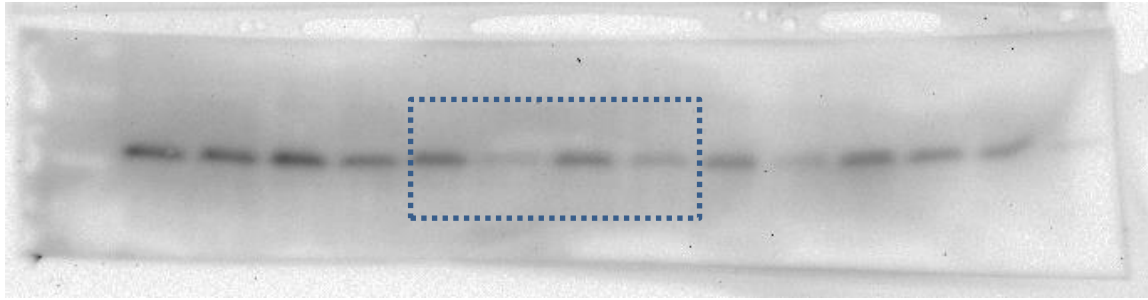

H3K27Ac

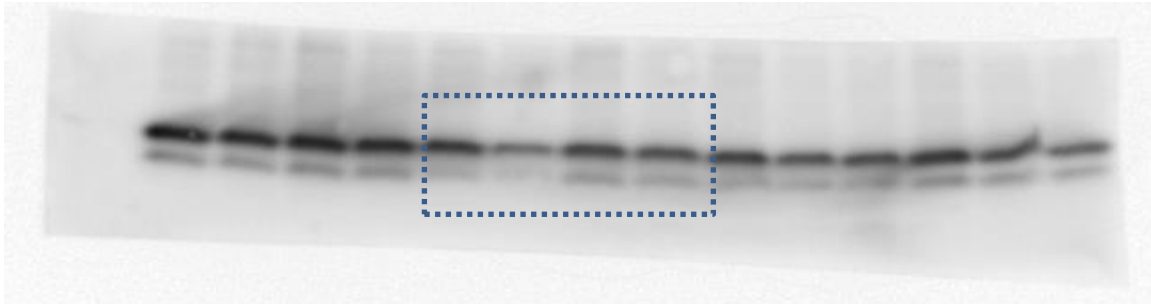

Stripped & reprobed H3

Uncropped blots from Figure 5B. V, vehicle; D, DFMO; blue, male trophoblasts; red, female trophoblasts

1 2 3 4 1 2 3 4 1 2 3 4

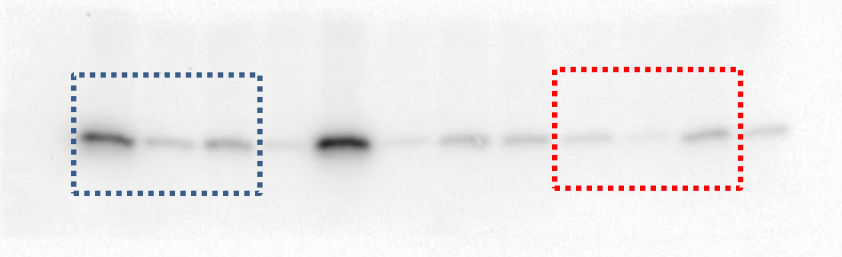

H3K27Ac

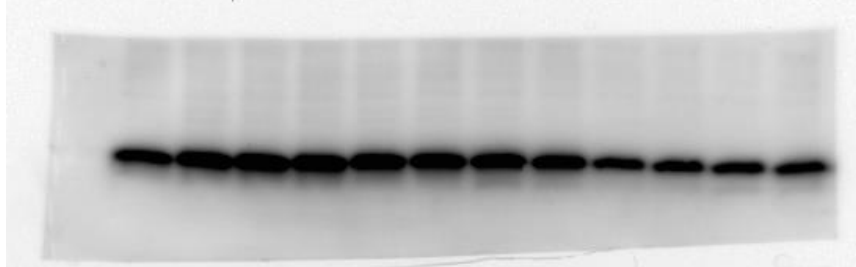

Stripped & reprobed H3

1: Scr; 2: Scr + DENSPM; 3: siSAT1+DENSPM; 4: siSAT1

Uncropped blots from Figure 5C. Blue numbers = male trophoblasts; red numbers = female trophoblasts

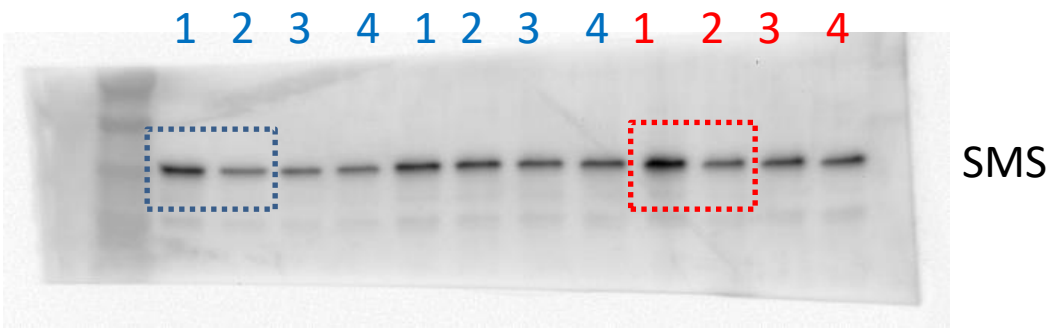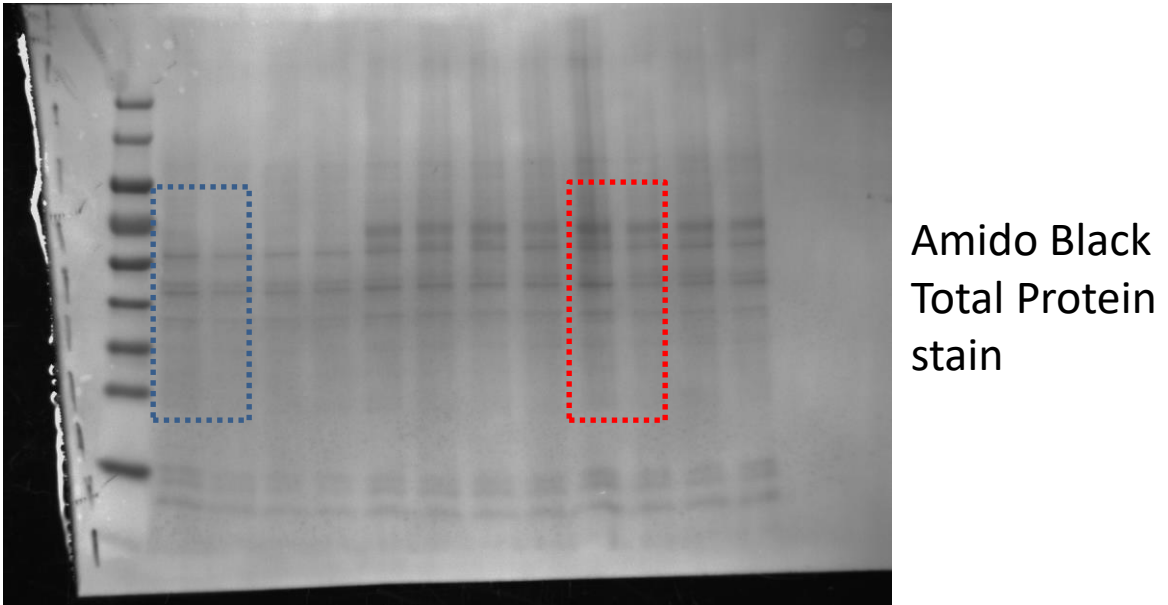

1: Scr; 2: siSMS#1; 3: siSMS#2 4: siSMS#3

Uncropped blots from Supplemental Figure 5A. Blue numbers = male trophoblasts; red numbers = female trophoblasts

1 2 3 4 5

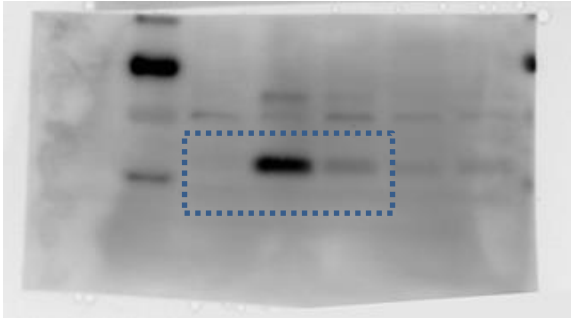

1 2 3 4 5

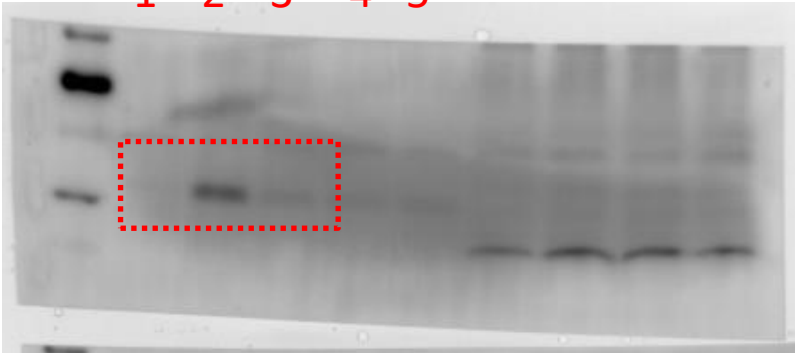

1 2 3 4 5

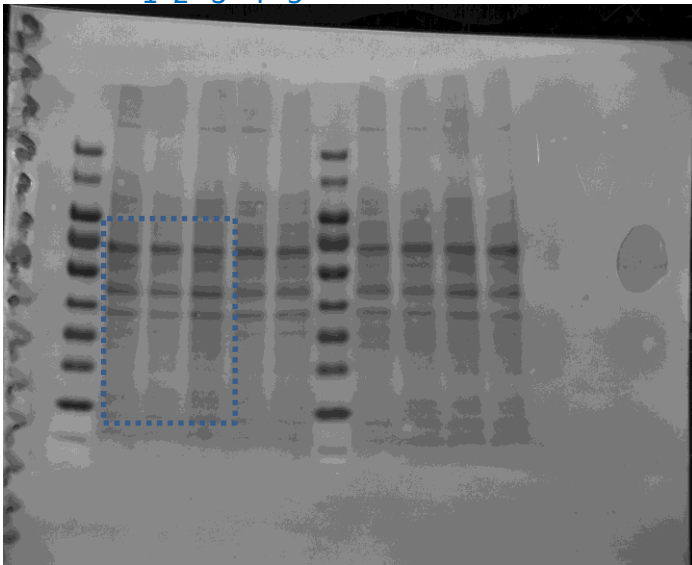

1 2 3 4 5

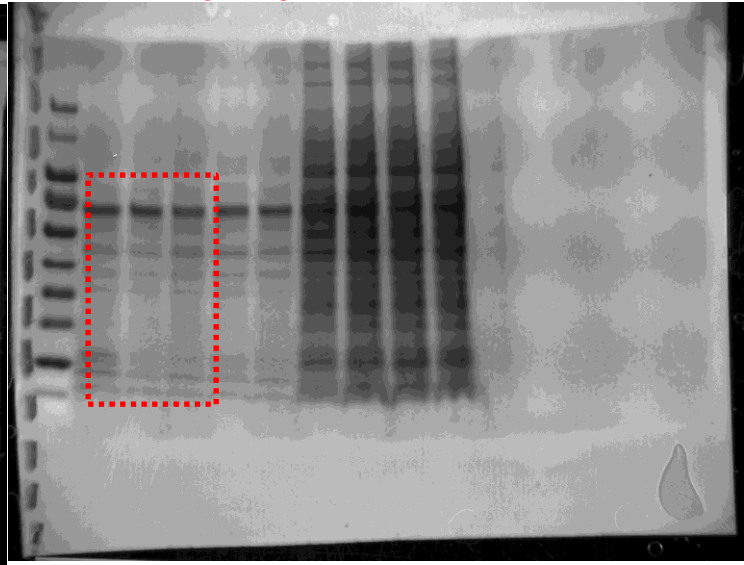

1: Scr; 2: Scr+DENSPM; 3: siSAT1#1 + DENSPM; 4: siSAT1#2 + DENSPM; 5: siSAT1 #3 + DENSPM

Uncropped blots from Supplemental Figure 5B. Blue numbers = male trophoblasts; red numbers = female trophoblasts

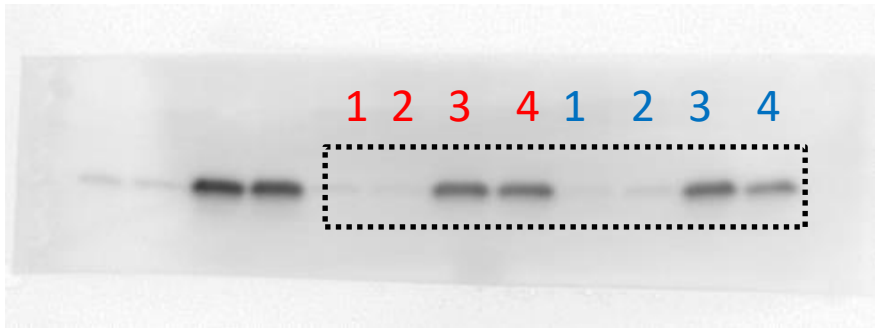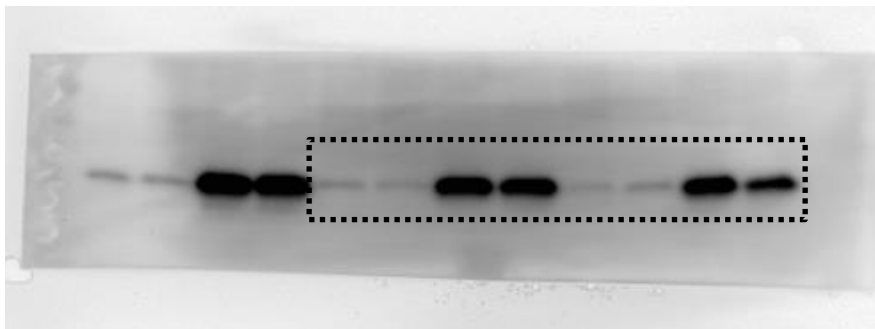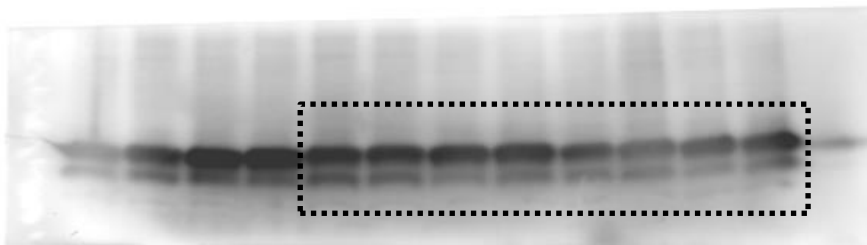

1: Veh, 2: DFMO, 3: TSA, 4: DFMO + TSA

Uncropped blots from Supplemental Figure 6B. Blue numbers = male trophoblasts; red numbers = female trophoblasts
