# Supplementary material for: Placental sex-dependent spermine synthesis regulates trophoblast gene expression through acetyl-coA metabolism and histone acetylation
Source: PubMed Central journal article supplement (PMC9200719; doi:10.1038/s42003-022-03530-6), 2022-06-15
Supplement: 42003_2022_3530_MOESM12_ESM.pdf [file 42003_2022_3530_MOESM12_ESM.pdf]

## Reporting Summary

Nature Research wishes to improve the reproducibility of the work that we publish. This form provides structure for consistency and transparency in reporting. For further information on Nature Research policies, see our [Editorial Policies](#) and the [Editorial Policy Checklist](#).

### Statistics

For all statistical analyses, confirm that the following items are present in the figure legend, table legend, main text, or Methods section.

- |     |           |
|-----|-----------|
| n/a | Confirmed |
|-----|-----------|
- The exact sample size ( $n$ ) for each experimental group/condition, given as a discrete number and unit of measurement
  - A statement on whether measurements were taken from distinct samples or whether the same sample was measured repeatedly
  - The statistical test(s) used AND whether they are one- or two-sided  
*Only common tests should be described solely by name; describe more complex techniques in the Methods section.*
  - A description of all covariates tested
  - A description of any assumptions or corrections, such as tests of normality and adjustment for multiple comparisons
  - A full description of the statistical parameters including central tendency (e.g. means) or other basic estimates (e.g. regression coefficient) AND variation (e.g. standard deviation) or associated estimates of uncertainty (e.g. confidence intervals)
  - For null hypothesis testing, the test statistic (e.g.  $F$ ,  $t$ ,  $r$ ) with confidence intervals, effect sizes, degrees of freedom and  $P$  value noted  
*Give  $P$  values as exact values whenever suitable.*
  - For Bayesian analysis, information on the choice of priors and Markov chain Monte Carlo settings
  - For hierarchical and complex designs, identification of the appropriate level for tests and full reporting of outcomes
  - Estimates of effect sizes (e.g. Cohen's  $d$ , Pearson's  $r$ ), indicating how they were calculated

*Our web collection on [statistics for biologists](#) contains articles on many of the points above.*

### Software and code

Policy information about [availability of computer code](#)

#### Data collection

Q-PCR and hetSNP allele typing analysis: QuantStudio Realtime PCR software (ThermoFisher Scientific)  
 Mass Spectrometry Spectra: ThermoExcalibur (ThermoFisher Scientific)  
 Metabolic phenotyping: Seahorse Wave Desktop v2.6.3.5 (Agilent)  
 Western Blot: Discovery Series Quantity One 1-D Analysis Software Version 4.6.8 (BioRad)  
 Microsoft Excel 2013 (Microsoft)

#### Data analysis

BBioinformatics software used:  
 GATK v3.4  
 FastQC (v0.11.4)  
 Salmon (v0.9.1)  
 DESeq2 (v1.18.1)  
 GSEA v.4.1.0  
 cutadapt (v2.7 with Python 3.6.8)  
 bowtie2 (v2.4.2)  
 sambamba (v0.7.1)  
 MACS2 (v.2.2.7.1)  
 ChIPseeker (v1.26)  
 DiffBind (v3.0.13)  
 R (v.4.0.3)

Bioconductor (v3.12)  
 Graph generation and statistical analyses: GraphPad Prism 9.2  
 Western blot data analysis: ImageJ 1.8.0  
 hetSNP allele typing analysis: Taqman Genotyper v.1.4

For manuscripts utilizing custom algorithms or software that are central to the research but not yet described in published literature, software must be made available to editors and reviewers. We strongly encourage code deposition in a community repository (e.g. GitHub). See the Nature Research [guidelines for submitting code & software](#) for further information.

## Data

Policy information about [availability of data](#)

All manuscripts must include a [data availability statement](#). This statement should provide the following information, where applicable:

- Accession codes, unique identifiers, or web links for publicly available datasets
- A list of figures that have associated raw data
- A description of any restrictions on data availability

RNA-sequencing and CHIP-sequencing data sets have been deposited in EBI ENA [www.ebi.ac.uk/ena/data/view/PRJEB45391](http://www.ebi.ac.uk/ena/data/view/PRJEB45391).  
 All source data for the figures are available in the Supplemental Information or Supplemental Data files. All other data (if any) are available upon reasonable request

## Field-specific reporting

Please select the one below that is the best fit for your research. If you are not sure, read the appropriate sections before making your selection.

- Life sciences       Behavioural & social sciences       Ecological, evolutionary & environmental sciences

For a reference copy of the document with all sections, see [nature.com/documents/nr-reporting-summary-flat.pdf](http://nature.com/documents/nr-reporting-summary-flat.pdf)

## Life sciences study design

All studies must disclose on these points even when the disclosure is negative.

|                 |                                                                                                                                                                                                                                                                                     |
|-----------------|-------------------------------------------------------------------------------------------------------------------------------------------------------------------------------------------------------------------------------------------------------------------------------------|
| Sample size     | We did not use statistical methods to calculate sample sizes, because the magnitudes of the effect sizes were not previously known. However, our sample sizes are similar to those reported in related publications in the field.                                                   |
| Data exclusions | No data was excluded                                                                                                                                                                                                                                                                |
| Replication     | All experiments were replicated in 5-10 biological replicates.                                                                                                                                                                                                                      |
| Randomization   | Randomization was not relevant to this study                                                                                                                                                                                                                                        |
| Blinding        | The investigators were not blinded to group allocation during experiments and outcome assessment due to the experimental design in which treatments and placental sex were purposefully selected for analysis. RNA-seq and ChIP-seq was performed blind to the experimental groups. |

## Reporting for specific materials, systems and methods

We require information from authors about some types of materials, experimental systems and methods used in many studies. Here, indicate whether each material, system or method listed is relevant to your study. If you are not sure if a list item applies to your research, read the appropriate section before selecting a response.

### Materials & experimental systems

| n/a                                 | Involved in the study                                           |
|-------------------------------------|-----------------------------------------------------------------|
| <input type="checkbox"/>            | <input checked="" type="checkbox"/> Antibodies                  |
| <input checked="" type="checkbox"/> | <input type="checkbox"/> Eukaryotic cell lines                  |
| <input checked="" type="checkbox"/> | <input type="checkbox"/> Palaeontology and archaeology          |
| <input checked="" type="checkbox"/> | <input type="checkbox"/> Animals and other organisms            |
| <input type="checkbox"/>            | <input checked="" type="checkbox"/> Human research participants |
| <input type="checkbox"/>            | <input checked="" type="checkbox"/> Clinical data               |
| <input checked="" type="checkbox"/> | <input type="checkbox"/> Dual use research of concern           |

### Methods

| n/a                                 | Involved in the study                           |
|-------------------------------------|-------------------------------------------------|
| <input type="checkbox"/>            | <input checked="" type="checkbox"/> ChIP-seq    |
| <input checked="" type="checkbox"/> | <input type="checkbox"/> Flow cytometry         |
| <input checked="" type="checkbox"/> | <input type="checkbox"/> MRI-based neuroimaging |

## Antibodies

Antibodies used

Rabbit monoclonal anti-spermine synthase (clone EPR9252(B)) Abcam ab156879  
 Rabbit polyclonal anti-SAT1 Abcam ab105220  
 Rabbit monoclonal anti-histone H3 (clone D1H2) Cell Signaling Technology 4499

Rabbit monoclonal anti-acetyl-histone H3 Lys9 (clone C5B11) Cell Signaling Technology 9649  
 Rabbit monoclonal anti-acetyl-histone H3 Lys14 (clone D4B9) Cell Signaling Technology 7627  
 Rabbit monoclonal anti-acetyl-histone H3 Lys18 (clone D8Z5H) Cell Signaling Technology 13998  
 Rabbit monoclonal anti-acetyl-histone H3 Lys27 (clone D5E4) Cell Signaling Technology 8173  
 HRP-conjugated anti-rabbit IgG Cell Signaling Technology 7074  
 Rabbit polyclonal anti-acetyl-histone H3 Lys27 (ChIP-grade) Abcam ab4729

## Validation

anti-spermine synthase: PMID: 33586680, 31391464, 29997303, 26910893  
 anti-SAT1 RRID:AB\_11127304  
 anti-histone H3 (clone D1H2): RRID:AB\_10544537  
 anti-acetyl-histone H3 Lys9 (clone C5B11): RRID:AB\_823528  
 anti-acetyl-histone H3 Lys14 (clone D4B9): RRID:AB\_10839410  
 anti-acetyl-histone H3 Lys18 (clone D8Z5H): RRID:AB\_2783723  
 anti-acetyl-histone H3 Lys27 (clone D5E4): RRID:AB\_10949503  
 anti-rabbit IgG: RRID:AB\_2099233  
 anti-acetyl-histone H3 Lys27 (ChIP-grade): RRID:AB\_2118291

## Human research participants

Policy information about [studies involving human research participants](#)

## Population characteristics

The POP study population was an unselected cohort of nulliparous women with a singleton pregnancy who delivered in Cambridge, UK. The cohort has been described in detail in our previous papers (Sovio et al, Lancet 2015;386(10008):2089-2097; Gaccioli et al, Placenta 2017;59(Supp1):S17-S25; Gong et al, JCI Insight 2018;3(13):e120723).

## Recruitment

Participants were recruited at their dating scan appointment at around 12 weeks of gestation. The representativeness of the recruited population has been described in our previous publication (Sovio et al, Lancet 2015;386(10008):2089-2097).

## Ethics oversight

Ethical approval was obtained from the Cambridgeshire 2 Research Ethics Committee (REC ID 07/H0308/163)

Note that full information on the approval of the study protocol must also be provided in the manuscript.

## Clinical data

Policy information about [clinical studies](#)

All manuscripts should comply with the ICMJE [guidelines for publication of clinical research](#) and a completed [CONSORT checklist](#) must be included with all submissions.

## Clinical trial registration

NA

## Study protocol

NA

## Data collection

NA

## Outcomes

NA

## ChIP-seq

### Data deposition

Confirm that both raw and final processed data have been deposited in a public database such as [GEO](#).

Confirm that you have deposited or provided access to graph files (e.g. BED files) for the called peaks.

## Data access links

*May remain private before publication.*

<https://www.ebi.ac.uk/ena/data/view/PRJEB45391> (raw data)  
<https://sung.github.io/placenta-polyamine-2022> (processed data)

## Files in database submission

ENA data includes reads (fastq), signals (bw) and peaks (bed) for all replicates, treatments and inputs.

## Genome browser session

(e.g. [UCSC](#))

*Provide a link to an anonymized genome browser session for "Initial submission" and "Revised version" documents only, to enable peer review. Write "no longer applicable" for "Final submission" documents.*

## Methodology

## Replicates

Biological replicates of male and female placentas, N=6 male placental trophoblasts, N=5 female placental trophoblasts comparing vehicle vs DFMO treatment. Input DNA from matching placental trophoblasts was used as controls

## Sequencing depth

Single end 50bp. Total number of reads: 379108610, Uniquely mapped reads: 275158075

|                         |                                                                                                                                                                                                                                                                                                                                                                                                                                                                                                      |
|-------------------------|------------------------------------------------------------------------------------------------------------------------------------------------------------------------------------------------------------------------------------------------------------------------------------------------------------------------------------------------------------------------------------------------------------------------------------------------------------------------------------------------------|
| Antibodies              | Rabbit polyclonal anti-acetyl-histone H3 Lys27 (ChIP-grade) Abcam ab4729                                                                                                                                                                                                                                                                                                                                                                                                                             |
| Peak calling parameters | Sequencing reads were mapped to the human genome reference GRCh38 version using bowtie2 (v2.4.2) with the default parameters followed by removing duplicate reads using sambamba (v.0.7.1). For peak callings, we used MACS2 (v.2.2.7.1) with the following parameters: --treatment \$TREATMENT-SAMPLE.bam --control \$MERGED_CONTROL_INPUT.bam --nomodel --extsize 148 --bdg. We merged BAM files of the inputs (i.e. controls) that match with the same sex-treatment types of the ChIP-Seq files. |
| Data quality            | We used only high quality reads by removing primer sequences and poor quality bases from the sequencing reads. We also removed duplicate reads using sambamba (v.0.7.1). We detected 71231 consensus peaks with a FDR 5%.                                                                                                                                                                                                                                                                            |
| Software                | Primer sequences and poor quality bases were trimmed from the sequencing reads using cutadapt (v2.7 with Python 3.6.8)<br>Mapping to GRCh38 version human genome using bowtie2 (v2.4.2)<br>Duplicated reads were discarded using sambamba (v0.7.1)<br>Peaks called using MACS2 (v.2.2.7.1)<br>Peaks annotated using ChIPseeker (v1.26)<br>Differentially bound regions (vehicle vs DFMO) DiffBind (v3.0.13) using background normalization                                                           |
